# Supplementary material for: Sulfur doped reduced graphene oxides with enhanced catalytic activity for oxygen reduction via molten salt redox-sulfidation
Source: Royal Society of Chemistry journal article supplement (doi:10.1039/c6cp06818a), 2016-01-01
Supplement: c6cp06818a1.pdf [file c6cp06818a1.pdf]

## Electronic Supporting Information

### Sulfur doped reduced graphene oxides with enhanced catalytic activity for oxygen reduction *via* molten salt redox-sulfidation

Yuxing Gu, Zhigang Chen, Juanjuan Tang, Wei Xiao, Xuhui Mao, Hua Zhu and Dihua Wang\*

#### Specific area and pore structure characterization

The specific surface area and the pore size distribution of rGO, S-rGO-6h and S-Co-rGO-6h samples were determined by N<sub>2</sub> adsorption and desorption isotherms (Fig. S1). The determined BET specific area, total pore volume and average pore size of these samples are summarized in Table S1.

**Table S1.** The BET specific area and pore structure parameters of the rGO, S-rGO-6h and S-Co-rGO-6h samples

| Sample      | S <sub>BET</sub><br>(m <sup>2</sup> /g) | V <sub>Tot</sub><br>(m <sup>3</sup> /g) | D <sub>Ave</sub><br>(nm) |
|-------------|-----------------------------------------|-----------------------------------------|--------------------------|
| rGO         | 232                                     | 0.10                                    | 7.3                      |
| S-rGO-6h    | 312                                     | 0.13                                    | 6.0                      |
| S-Co-rGO-6h | 214                                     | 0.09                                    | 4.9                      |

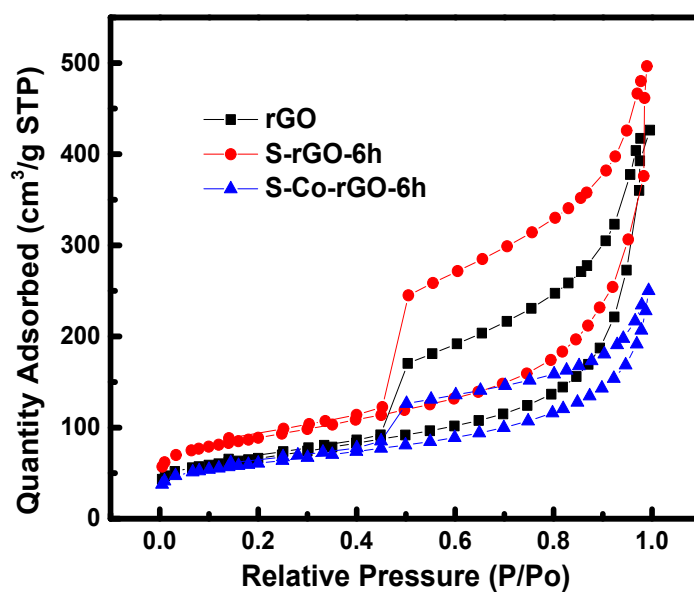

Fig. S1 Nitrogen adsorption/desorption isotherms for the rGO, S-rGO-6h and S-Co-rGO-6h samples

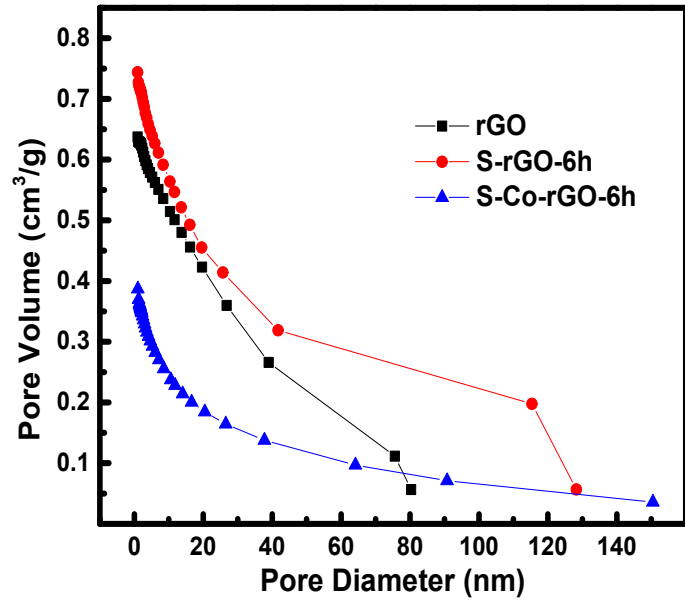

Fig. S2 Pore distribution of rGO, S-rGO-6h and S-Co-rGO-6h

#### EIS measurement

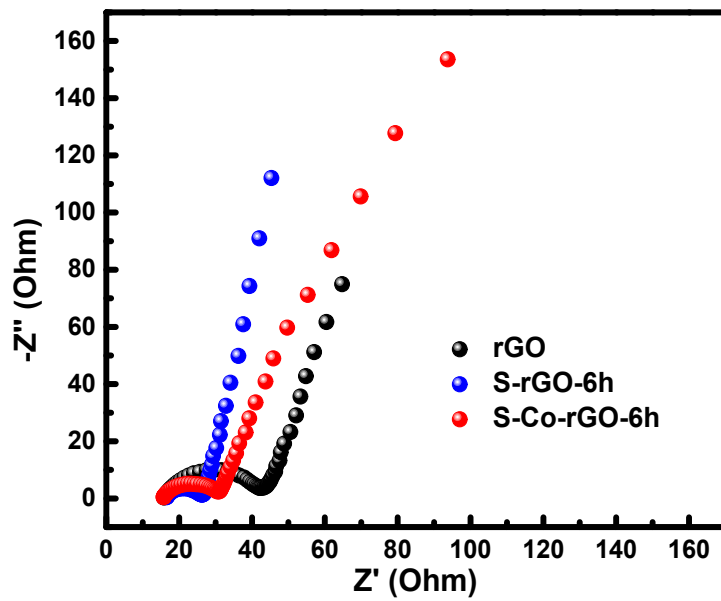

Fig. S3 Nyquist plots of rGO, S-rGO-6h and S-Co-rGO-6h performed in 0.1 M KOH.

## Durability test

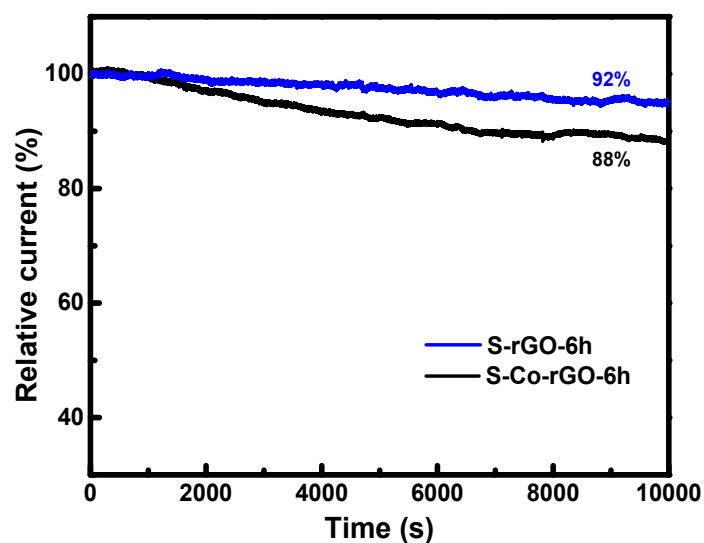

Fig. S4 Durability tests of S-rGO-6h and S-Co-rGO-6h, at -0.4V in O<sub>2</sub>-saturated 0.1 M KOH solution with a rotation rate of 1,600 rpm

### The calculation of electron transfer number

The Koutecky–Levich equations shown below were employed to analyze the transferred electron number ( $n$ ):

$$\frac{1}{J} = \frac{1}{J_L} + \frac{1}{J_K} = \frac{1}{B\omega^{1/2}} + \frac{1}{J_K} \quad (S1)$$

$$B = 0.2nFC_0(D_0)^{2/3}\nu^{-1/6} \quad (S2)$$

$$J_K = nFkC_0 \quad (S3)$$

where  $J$  is the measured current density,  $J_K$  and  $J_L$  are the kinetic and diffusion limiting current densities, respectively,  $\omega$  is the angular velocity of the disk, and  $n$  is the overall number of electrons transferred in oxygen reduction. According to eqn (S1) and (S2),  $n$  and  $J_K$  can be obtained from the slope and intercept of the Koutecky–Levich plots, respectively.  $F$  is the Faraday constant ( $F=96485 \text{ C mol}^{-1}$ ),  $C_0$  is the bulk concentration of oxygen ( $C_0=1.2 \times 10^{-3} \text{ mol L}^{-1}$ ),  $\nu$  is the kinetic viscosity of the electrolyte ( $\nu=0.1 \text{ m}^2 \text{ s}^{-1}$  in 0.1 M KOH) and  $k$  is the electron transfer rate constant.  $D_0$  is the diffusion coefficient of O<sub>2</sub> in 0.1 M KOH ( $D_0=1.9 \times 10^{-5} \text{ cm}^2 \text{ s}^{-1}$  at 25 °C). The constant of 0.2 is adopted when the rotating speed is expressed in rpm, and it changes to 0.62 when the rotating speed is expressed in rps.
